# Supplementary material
Source: publisher figshare collection journal article supplement (https://sage.figshare.com/ndownloader/files/23507462)
Supplement: Supplementary file 1 [file 23507462]

| Study | Methodology | | | *n* | | Implementers | Type of PD | Duration | Provider |
| --- | --- | --- | --- | --- | --- | --- | --- | --- | --- |
| Allor et al. (2010) | Descriptive | | | NR | | SpEd Teacher | Workshop; coaching | NR | Reading Coach |
| Anderson (2009) | Group/Quasi Experimental | | | 23 | | SpEd Teacher, Interventionist | Workshop | 1 day | Researcher |
| Bock & Erickson (2015) | Qualitative | | | 7 | | SpEd Teacher | Workshops; Project overview | 8.25-17.75 hours | Researcher |
| Browder et al. (2008) | Group/Quasi Experimental | | | 7 | | SpEd Teacher | Workshop; consultation | 2 days | Researcher |
| Brownell et al. (2017) | Group/Quasi Experimental | | | 42 | | SpEd Teacher | Institute; coaching | >20 hours | Researcher |
| Brown, Morris & Fields (2005) | Group/Quasi Experimental | | | 68 | | SpEd Teacher, Interventionist, Para, GenEd Teacher | Practicum with practice/debrief; coaching | 20 hours | Researcher; Reading Specialists |
| Table 3S *continued.* | | | | | | | | | |
| Study | Methodology | | | *n* | | Implementers | Type of PD | Duration | Provider |
| Bursuck et al. (2004) | Group/Quasi Experimental | | | 8 | | SpEd Teacher, Para | Workshop; consultation | NR | Researcher |
| De La Cruz (2009) | Mixed Methods | | | 13 | | SpEd Teacher, Interventionist | Workshop;  staff meetings;  1:1 training | 1 day | Content Expert |
| Denton (2008) | Group/Quasi Experimental | | | 2 | | SpEd Teacher, Teacher (not specified) | Workshop; coaching | 10 hours | Researcher |
| Denton, Fletcher, Anthony & Francis (2006) | Group /Quasi-Experimental | | | 6 | | Tutor, SpEd Teacher, GenEd Teacher | Full-week training | 1 week | Researcher |
| Denton et al. (2013) | Group/Quasi Experimental | | | 6 | | Teacher (not specified), Clinical Reading Tutor | Workshop; coaching | 46 hours | Researcher |
| Dingle et al. (2011) | Qualitative | | | 3 | | SpEd Teacher | Institute; online forum; observations | 2.5 days | Not specified |
| Table 3S *continued.* | | | | | | | | | |
| Study | Methodology | | | *n* | | Implementers | Type of PD | Duration | Provider |
| Fuchs, Deno & Mirkin (1984) | Group/Quasi Experimental | | | 18 | | SpEd Teacher | 1:1 training | NR | Teacher Trainers |
| Gelzheiser et al. (2011) | Group/Quasi Experimental | | | 5 | | Teacher (not specified) | Workshop; coaching | 8 days | Not specified |
| Hof-Dunn (2015) | Group/Quasi Experimental | | | 48 | | Teacher (not specified) | Workshop; coaching | 5 days | Not specified |
| Jitendra et al. (2004) | | Single Case | 5 | | SpEd Teacher, Para, Graduate Students | | Workshop; coaching | 2 hours | Researcher | |
| Mathes et al. (2005) | | Group/Quasi Experimental | 6 | | SpEd Teacher, GenEd Teacher, Other | | Workshop; follow up training | 42 hours | Program creators | |
| Neugebauer et al. (2016) | | Group/Quasi Experimental | 48 | | SpEd Teacher, Interventionist, Para, Teacher (not specified) | | Workshop; follow up training | 2 days | Not specified | |

| Study | | Methodology | | | *n* | | Implementers | Type of PD | Duration | Provider |
| --- | --- | --- | --- | --- | --- | --- | --- | --- | --- | --- |
| Pinnell et al. (1994) | | | Group/Quasi Experimental | NR | | Teacher (not specified) | | 2 week Reading Success (RS) course; Reading Recovery (RR) 1-year course; follow up training | RR – 75 hours;  RS – 70 hours | Specially trained teacher leaders | |
| Siuty, Leko, & Knackstedt (2018) | | | Qualitative | 5 | | SpEd Teacher, Teacher (not specified), GenEd Teacher, | | Workshop; coaching | 2 day | Scholastic Representative | |
| Tamm et al. (2017) | | | Group/Quasi Experimental | NR | | Teacher (not specified) | | Workshop; coaching | 4 days | Researcher; Reading specialists | |
| Torgesen et al. (2010) | | | Group/Quasi Experimental | 6 | | Teacher (not specified) | | Workshop; Staff meetings | 18 hours initial | Not specified | |
| Study | | Methodology | | | *n* | | Implementers | Type of PD | Duration | Provider |
| Vadasy & Sanders (2011) | | | Group/Quasi Experimental | 25 | | Para | | Workshop; coaching | 2 hours | Researchers | |
| Vadasy, Sanders & Abbott (2008) | | | Group/Quasi Experimental | 33 | | Para, Tutor/ Volunteer | | Workshop; coaching | 3 hours | Researcher | |
| Vadasy, Sanders & Peyton (2005) | Group/Quasi Experimental | | | 19 | | Para | | Workshop; coaching | 2-4 hours | Researchers | | |
| *Note.* SpEd = special education; Para = paraprofessional; GenEd = general education; Interventionist = intervention specialist. | | | | | | | | | | | | |
